# Supplementary material for: Enhanced Homing of Mesenchymal Stem Cells Overexpressing Fibroblast Growth Factor 21 to Injury Site in a Mouse Model of Traumatic Brain Injury
Source: PubMed Central journal article supplement (PMC6600548; doi:10.3390/ijms20112624), 2019-05-28
Supplement: ijms-20-02624-s001.pdf [file ijms-20-02624-s001.pdf]

## Shahror et al-Figure S1

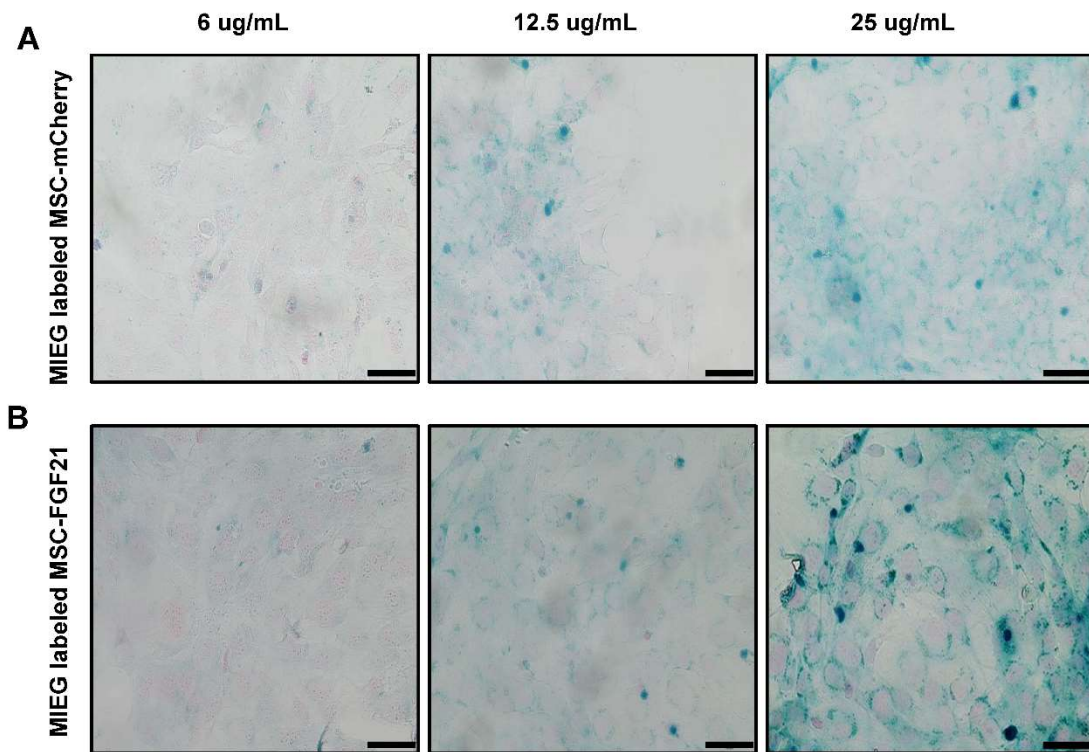

**Figure S1: Prussian blue staining of MIEG labeled MSCs.** Presence of MIEG in MSCs was detected by Prussian blue staining. Representative light microscope of MSC-mCherry (A) and MSC-FGF21 (B) incubated with different concentrations of MIEG for 24 h. scale bar 50 µm
